# Supplementary material for: Senescent epithelial cells remodel the microenvironment for the progression of oral submucous fibrosis through secreting TGF-β1
Source: PeerJ. 2023 Apr 19;11:e15158. doi: 10.7717/peerj.15158 (PMC10122456; doi:10.7717/peerj.15158)
Supplement: Supplemental Information 1 [file peerj-11-15158-s001.xlsx]

## Sheet: Sheet1
	SA-β-gal-HOKs	SA-β-gal+HOKs
average-1	290.75	7778.44
average-2	566.324	4394.78
average-3	367.663	3051.01
average-4	997.449	4280.66
average-5	532.869	9153.74
