# Supplementary material for: Senescent epithelial cells remodel the microenvironment for the progression of oral submucous fibrosis through secreting TGF-β1
Source: PeerJ. 2023 Apr 19;11:e15158. doi: 10.7717/peerj.15158 (PMC10122456; doi:10.7717/peerj.15158)
Supplement: Supplemental Information 2 [file peerj-11-15158-s002.xlsx]

## Sheet: Sheet1
p16（MOD)	p21(MOD)	α-SMA(MOD)	PCNA(MOD)
0	0.01	0.01	0.000164
0	0.013333	0.02	0.000257
0	0	0.006667	0.000167
0.003333	0.01	0.023333	0.000177
0.006667	0.01	0	0.000124
0.003333	0.013333	0.006667	0.000109
0.003333	0.01	0.016667	0.000165
0	0.006667	0.01	4.33e-05
0	0.003333	0.01	1.29e-05
0.0533333	0.0766667	0.0333333	7.4228e-06
0.06	0.0333333	0.0866667	6.8295e-06
0.03	0.0166667	0.05	5.0013e-06
0.0566667	0.07	0.08	2.3753e-06
0.106667	0.0233333	0.0233333	1.3277e-05
0.106667	0.0533333	0.06	2.7161e-06
0.08	0.0366667	0.0333333	2.6506e-06
0.0333333	0.0433333	0.05	4.3058e-06
0.136667	0.03	0.0166667	5.2425e-06
0.0466667	0.04	0.03	3.365e-06
0.08	0.0533333	0.0333333	2.0982e-05
0.0633333	0.0433333	0	5.4989e-06
0.0766667	0.0366667	0.0333333	8.907e-06
0.0833333	0.04	0.0666667	2.3741e-06
0.153333	0.0466667	0.0666667	2.3158e-06
0.0866667	0.04	0.0733333	6.3715e-06
0.0633333	0.02	0.05	4.4901e-06
0.0110827	0.0361088	0.00063434	5.3545e-06
0.04203	0.078884	0.0138426	3.61e-05
0.060872	0.096684	0.063434	5.08e-05
0.126887	0.125366	0.0765517	8.05e-05
