# Supplementary material for: Senescent epithelial cells remodel the microenvironment for the progression of oral submucous fibrosis through secreting TGF-β1
Source: PeerJ. 2023 Apr 19;11:e15158. doi: 10.7717/peerj.15158 (PMC10122456; doi:10.7717/peerj.15158)
Supplement: Supplemental Information 3 [file peerj-11-15158-s003.xlsx]

## Sheet: Sheet1
	0μg/ml-24h	0μg/ml-48h	0μg/ml-72h	0μg/ml-96h
average-1	0.398	0.62	1.046	1.374
average-2	0.375	0.626	1.032	1.269
average-3	0.376	0.632	1.029	1.05
	20μg/ml-24h	20μg/ml-48h	20μg/ml-72h	20μg/ml-96h
average-1	0.379	0.623	1.049	1.575
average-2	0.401	0.598	1.029	1.526
average-3	0.389	0.601	1.076	1.614
	40μg/ml-24h	40μg/ml-48h	40μg/ml-72h	40μg/ml-96h
average-1	0.348	0.535	0.883	1.044
average-2	0.343	0.532	0.865	1.359
average-3	0.354	0.598	0.916	0.974
	80μg/ml-24h	80μg/ml-48h	80μg/ml-72h	80μg/ml-96h
average-1	0.34	0.555	0.973	1.352
average-2	0.343	0.573	0.986	1.5
average-3	0.338	0.587	1.01	1.376
	160μg/ml-24h	160μg/ml-48h	160μg/ml-72h	160μg/ml-96h
average-1	0.386	0.464	0.679	0.987
average-2	0.407	0.46	0.669	1.067
average-3	0.398	0.459	0.673	0.992
	320μg/ml-24h	320μg/ml-48h	320μg/ml-72h	320μg/ml-96h
average-1	0.318	0.313	0.448	0.576
average-2	0.337	0.314	0.439	0.535
average-3	0.334	0.349	0.432	0.511
