# Supplementary material for: Senescent epithelial cells remodel the microenvironment for the progression of oral submucous fibrosis through secreting TGF-β1
Source: PeerJ. 2023 Apr 19;11:e15158. doi: 10.7717/peerj.15158 (PMC10122456; doi:10.7717/peerj.15158)
Supplement: Supplemental Information 4 [file peerj-11-15158-s004.xlsx]

## Sheet: Sheet1
The proporation of SA-β-gal+ cells	0μg/ml	20μg/ml	40μg/ml	80μg/ml	160μg/ml	320μg/ml
average-1	0.36	2.21	1.89	5.94	8.33	46.24
average-2	0.65	0.53	1.32	7.56	10.71	34.27
average-3	1.18	0.88	1.6	4.65	7.18	35.14
