# Supplementary material for: Senescent epithelial cells remodel the microenvironment for the progression of oral submucous fibrosis through secreting TGF-β1
Source: PeerJ. 2023 Apr 19;11:e15158. doi: 10.7717/peerj.15158 (PMC10122456; doi:10.7717/peerj.15158)
Supplement: Supplemental Information 5 [file peerj-11-15158-s005.xlsx]

## Sheet: Sheet1
WB	0μg/ml	320μg/ml
p21/GAPDH-average-1	0.230674	0.728626
p21/GAPDH-average-2	0.167336	0.467753
p21/GAPDH-average-3	0.2092	0.531388
p53/GAPDH-average-1	5.65111	13.174
p53/GAPDH-average-2	4.51088	14.7514
p53/GAPDH-average-3	11.6591	19.0008
p16/GAPDH-average-1	0.483584	0.56464
p16/GAPDH-average-2	0.65305	0.579725
p16/GAPDH-average-3	0.877874	0.756751
TGF-β1/GAPDH-average-1	1.00282	1.16204
TGF-β1/GAPDH-average-2	0.894271	1.42271
TGF-β1/GAPDH-average-3	0.738226	1.41864
Elisa	0μg/ml（ng/μL）	320μg/ml（ng/μL)
TGF-β1/GAPDH-average-1	558.586	1446.24
TGF-β1/GAPDH-average-2	916.986	1728.15
TGF-β1/GAPDH-average-3	889.81	1887.12
qRT-pcr	0μg/ml（Average 2-ΔΔCt)	320μg/ml（Average 2-ΔΔCt)
p16-1	1	0.365461
p16-2	1	0.511934
p16-3	1	0.504182
p21-1	1	2.20433
p21-2	1	1.35124
p21-3	1	1.63763
p53-1	1	0.568109
p53-2	1	0.499544
p53-3	1	0.523573
TGF-β1-1	1	1.62998
TGF-β1-2	1	2.53362
TGF-β1-3	1	2.17598
